# Supplementary material
Source: MDPI journal article supplement (https://www.mdpi.com/1424-8247/16/1/41)
Supplement: s1 [file s1]

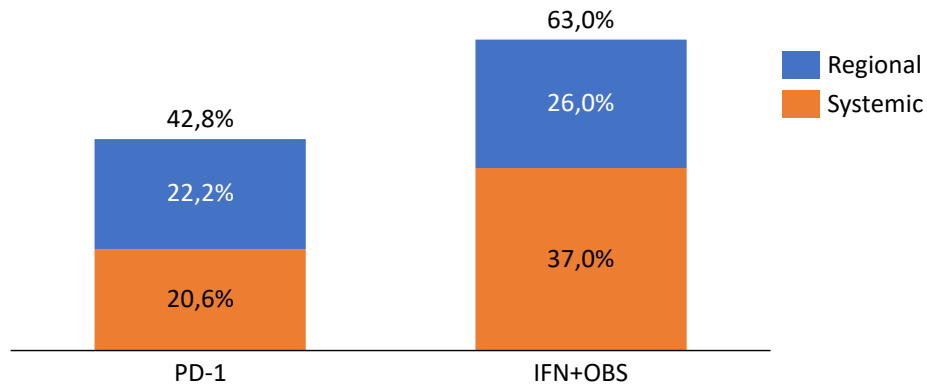

**Figure S1.** Recurrence patterns for acral and cutaneous melanoma patients.

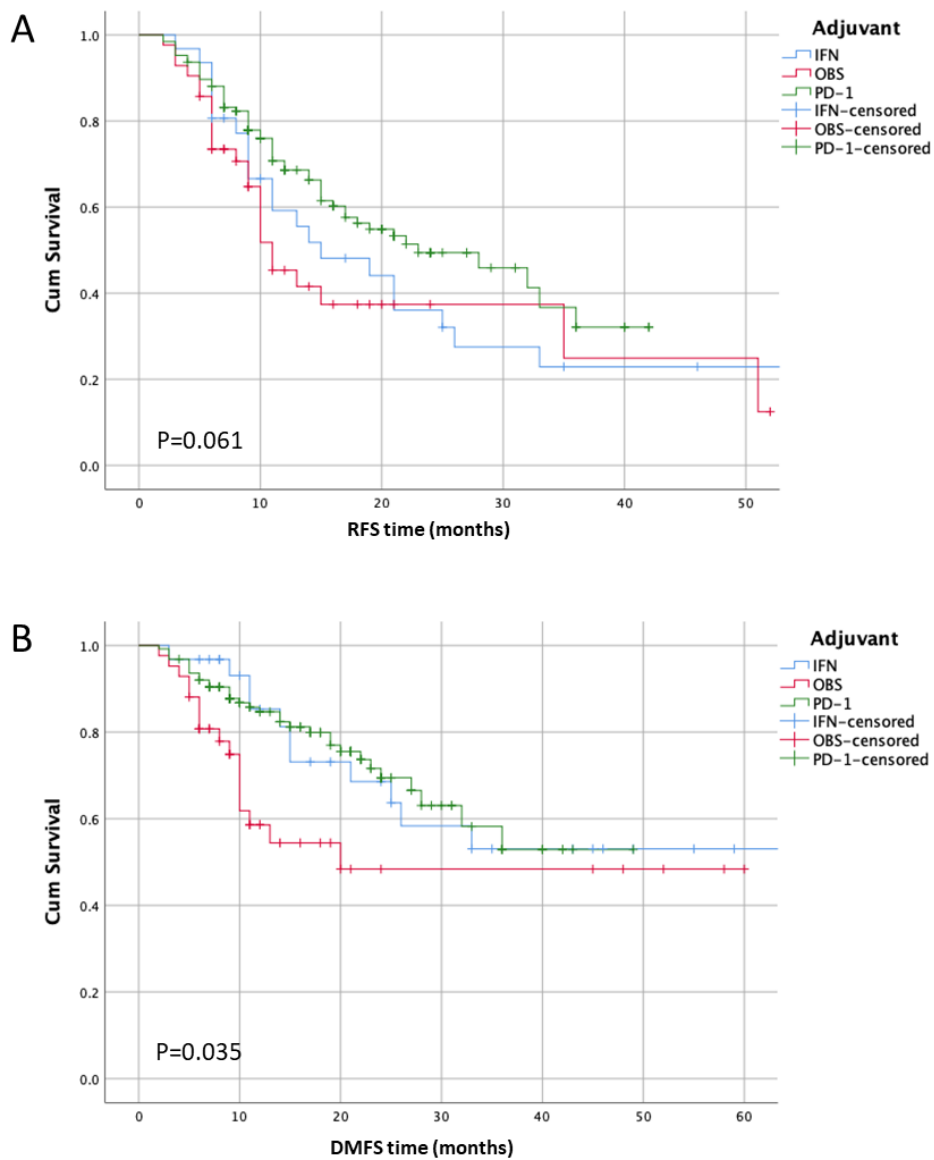

**Figure S2.** Kaplan-Meier curves of RFS (A) and DMFS (B) for all enrolled acral and cutaneous patients stratified by adjuvant PD-1 inhibitor treatment versus conventional IFN treatment or observation.

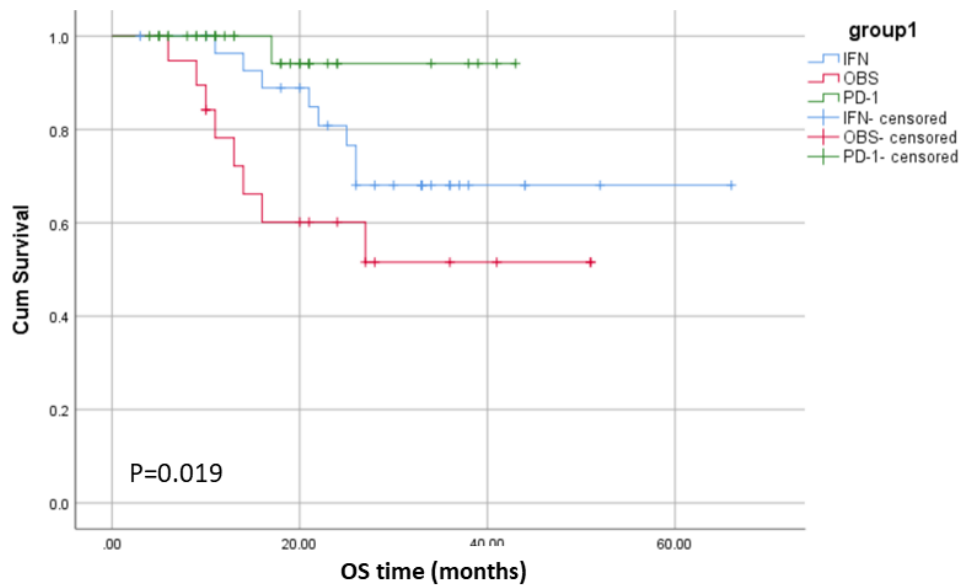

**Figure S3.** OS among all enrolled acral and cutaneous melanoma patients stratified by adjuvant PD-1 inhibitor treatment versus conventional IFN or observation, with a p-value of 0.019 between the PD-1 and the IFN groups.

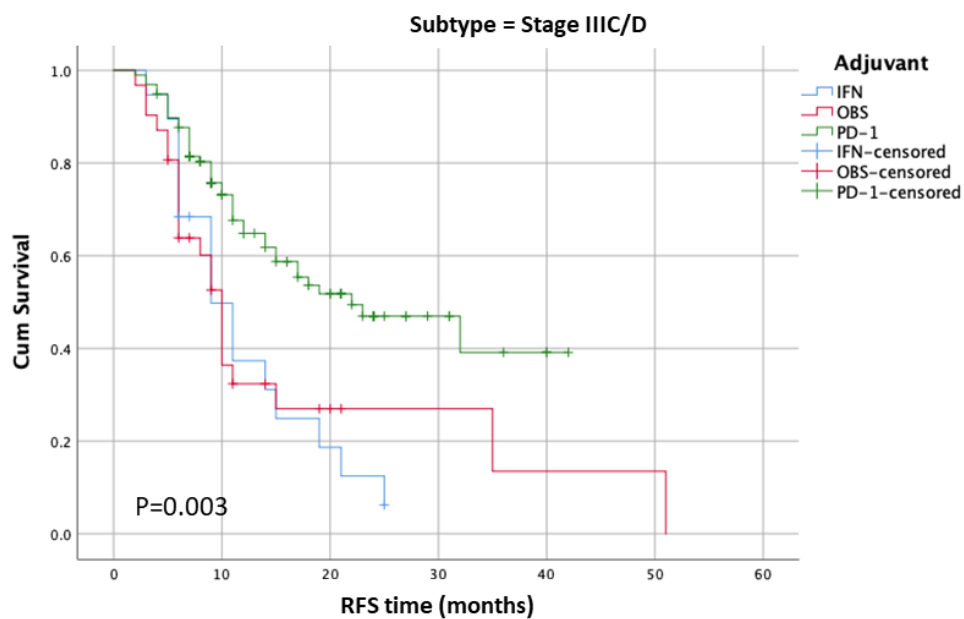

**Figure S4.** RFS for all stage IIIC and IIID melanoma patients stratified by adjuvant PD-1 inhibitor treatment versus conventional IFN or observation, with a p-value of 0.003 between the PD-1 and the IFN groups.

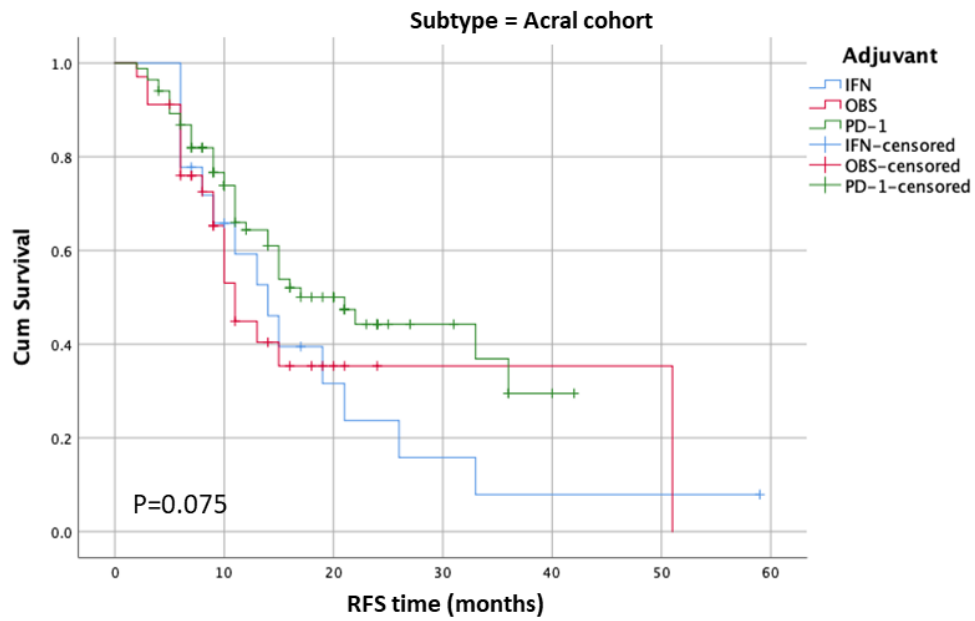

**Figure S5.** RFS for all acral melanoma patients stratified by adjuvant PD-1 inhibitor treatment versus conventional IFN or observation, with a p-value of 0.075 between the PD-1 and the IFN groups.

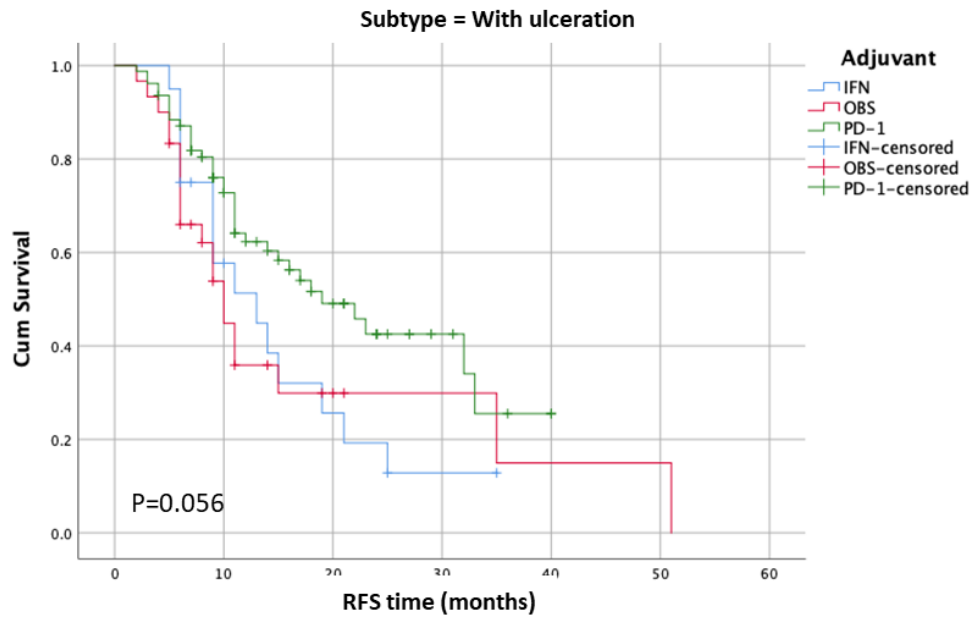

**Figure S6.** RFS for all enrolled patients with ulceration stratified by adjuvant PD-1 inhibitor treatment versus conventional IFN or observation, with a p-value of 0.056 between the PD-1 and the IFN groups.

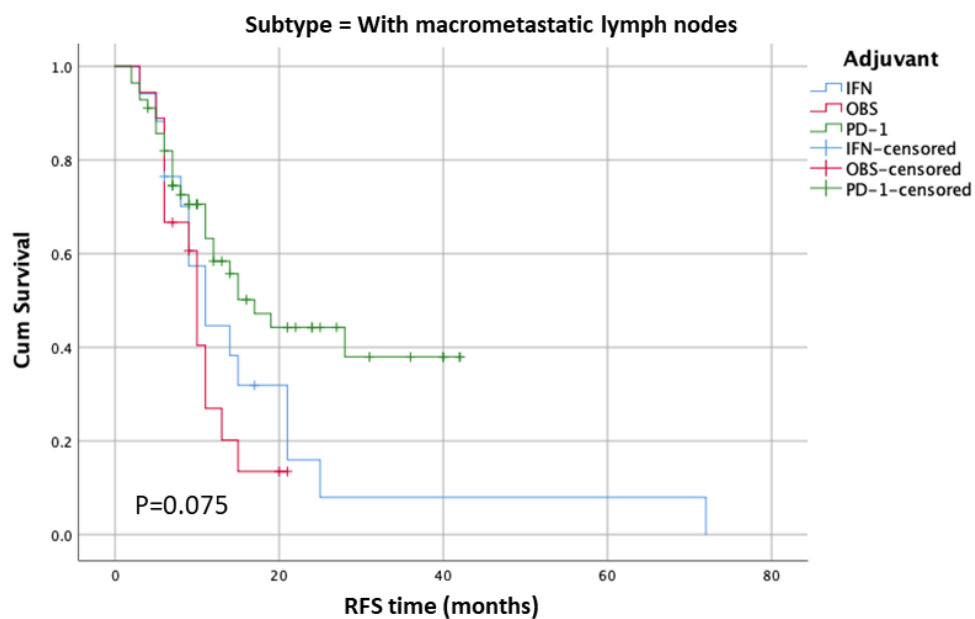

**Figure S7.** RFS for all melanoma patients with macrometastatic lymph nodes stratified by adjuvant PD-1 inhibitor treatment versus conventional IFN or observation, with a p-value of 0.075 between the PD-1 and the IFN groups.

**Table S1.** RFS of enrolled patients treated with the adjuvant PD-1 inhibitor versus conventional IFN or observation.

|         | mFP | mRFS | 1-yr RFS | 2-yr RFS | P value (vs PD-1)                     |
|---------|-----|------|----------|----------|---------------------------------------|
| PD-1    | 21  | 23   | 70.0%    | 49.4%    | 0.170<br><b>0.036</b><br><b>0.027</b> |
| IFN     | 24  | 15   | 59.2%    | 35.1%    |                                       |
| OBS     | 49  | 11   | 45.3%    | 37.4%    |                                       |
| IFN+OBS | 46  | 13   | 51.8%    | 35.1%    |                                       |

**Table S2.** DMFS of enrolled patients treated with the adjuvant PD-1 inhibitor versus conventional IFN or observation.

|         | mFP | mDMFS | 1-yr DMFS | 2-yr DMFS | P value (vs PD-1)              |
|---------|-----|-------|-----------|-----------|--------------------------------|
| PD-1    | 21  | NR    | 84.7%     | 69.4%     | 0.106<br><b>0.014</b><br>0.087 |
| IFN     | 24  | 72    | 85.3%     | 68.5%     |                                |
| OBS     | 49  | 20    | 58.6%     | 48.4%     |                                |
| IFN+OBS | 46  | 33    | 70.5%     | 57.3%     |                                |
